# Supplementary material
Source: Research Square preprint supplement (doi:10.21203/rs.3.rs-10087409/v1)
Supplement: Supplementary file 1 [file fece808f9ca94f3fc214083a.docx]

**Appendix 1**

| **SEDENTARY BEHAVIOUR: Weekdays** | | | | | | | | | |
| --- | --- | --- | --- | --- | --- | --- | --- | --- | --- |
| On a typical WEEKDAY, how much time do you spend (from when you wake up until you go to bed) doing the following? | | | | | | | | | |
|  | None | 15  min. or less | 30  min. | 1  hr | 2  hrs | 3  hrs | 4  hrs | 5  hrs | 6  hrs or more |
| 1. Watching television (including videos on VCR/DVD). | 🞅 | 🞅 | 🞅 | 🞅 | 🞅 | 🞅 | 🞅 | 🞅 | 🞅 |
| 2. Playing computer or video games. | 🞅 | 🞅 | 🞅 | 🞅 | 🞅 | 🞅 | 🞅 | 🞅 | 🞅 |
| 3. Sitting listening to music on the radio, tapes, or CDs. | 🞅 | 🞅 | 🞅 | 🞅 | 🞅 | 🞅 | 🞅 | 🞅 | 🞅 |
| 4. Sitting and talking on the phone. | 🞅 | 🞅 | 🞅 | 🞅 | 🞅 | 🞅 | 🞅 | 🞅 | 🞅 |
| 5. Doing paperwork or computer work (office work, emails, paying bills, etc.) | 🞅 | 🞅 | 🞅 | 🞅 | 🞅 | 🞅 | 🞅 | 🞅 | 🞅 |
| 6. Sitting reading a book or magazine. | 🞅 | 🞅 | 🞅 | 🞅 | 🞅 | 🞅 | 🞅 | 🞅 | 🞅 |
| 7. Playing a musical instrument. | 🞅 | 🞅 | 🞅 | 🞅 | 🞅 | 🞅 | 🞅 | 🞅 | 🞅 |
| 8. Doing artwork or crafts. | 🞅 | 🞅 | 🞅 | 🞅 | 🞅 | 🞅 | 🞅 | 🞅 | 🞅 |
| 9. Sitting and driving in a car, bus, or train. | 🞅 | 🞅 | 🞅 | 🞅 | 🞅 | 🞅 | 🞅 | 🞅 | 🞅 |

| **SEDENTARY BEHAVIOR: Weekend Days** | | | | | | | | | |
| --- | --- | --- | --- | --- | --- | --- | --- | --- | --- |
| On a typical WEEKEND DAY, how much time do you spend (from when you wake up until you go to bed) doing the following? | | | | | | | | | |
|  | None | 15  min. or less | 30  min | 1  hr | 2  hrs | 3  hrs | 4  hrs | 5  hrs | 6  hrs or more |
| 1. Watching television (including videos on VCR/DVD). | 🞅 | 🞅 | 🞅 | 🞅 | 🞅 | 🞅 | 🞅 | 🞅 | 🞅 |
| 2. Playing computer or video games. | 🞅 | 🞅 | 🞅 | 🞅 | 🞅 | 🞅 | 🞅 | 🞅 | 🞅 |
| 3. Sitting listening to music on the radio, tapes, or CDs. | 🞅 | 🞅 | 🞅 | 🞅 | 🞅 | 🞅 | 🞅 | 🞅 | 🞅 |
| 4. Sitting and talking on the phone. | 🞅 | 🞅 | 🞅 | 🞅 | 🞅 | 🞅 | 🞅 | 🞅 | 🞅 |
| 5. Doing paperwork or computer work (office work, emails, paying bills, etc.) | 🞅 | 🞅 | 🞅 | 🞅 | 🞅 | 🞅 | 🞅 | 🞅 | 🞅 |
| 6. Sitting reading a book or magazine. | 🞅 | 🞅 | 🞅 | 🞅 | 🞅 | 🞅 | 🞅 | 🞅 | 🞅 |
| 7. Playing a musical instrument. | 🞅 | 🞅 | 🞅 | 🞅 | 🞅 | 🞅 | 🞅 | 🞅 | 🞅 |
| 8. Doing artwork or crafts. | 🞅 | 🞅 | 🞅 | 🞅 | 🞅 | 🞅 | 🞅 | 🞅 | 🞅 |
| 9. Sitting and driving in a car, bus, or train. | 🞅 | 🞅 | 🞅 | 🞅 | 🞅 | 🞅 | 🞅 | 🞅 | 🞅 |
